# Supplementary material for: The transcriptome of potato tuber phellogen reveals cellular functions of cork cambium and genes involved in periderm formation and maturation
Source: PubMed Central journal article supplement (PMC6629697; doi:10.1038/s41598-019-46681-z), 2019-07-15
Supplement: 41598_2019_46681_MOESM3_ESM.pdf [file 41598_2019_46681_MOESM3_ESM.pdf]

## Supplementary information

### **The transcriptome of potato tuber phellogen reveals cellular functions of cork cambium and genes involved in periderm formation and maturation**

Vijaya K. R. Vulavala<sup>1,2</sup>, Edna Fogelman<sup>1</sup>, Adi Faigenboim<sup>1</sup>, Oded Shoseyov<sup>2</sup>, Idit Ginzberg<sup>1,\*</sup>

<sup>1</sup>Institute of Plant Sciences, Agricultural Research Organization, Volcani Center, 68 HaMacabim Road, P. O. Box 15159, Rishon LeZion, 7505101, Israel

<sup>2</sup>The Robert H. Smith Institute of Plant Sciences and Genetics in Agriculture, Faculty of Agriculture, Hebrew University of Jerusalem, Rehovot 7610001, Israel

\* Corresponding author, E-mail: [iditgin@volcani.agri.gov.il](mailto:iditgin@volcani.agri.gov.il)

**Table S2** List of meristem-related genes found in the phellogen transcriptome

| Gene name                                               | Sol genomics ID    | TAIR ID     | Reference |
|---------------------------------------------------------|--------------------|-------------|-----------|
| <b>Cambium</b>                                          |                    |             |           |
| <i>ACA8</i>                                             | Sotub07g009770.1.1 | AT5G57110.2 | 1         |
| <i>AGO4</i>                                             | Sotub01g009760.1.1 | AT2G27040.2 | 1         |
| <i>APH3</i>                                             | Sotub01g022470.1.1 | AT3G21510.1 | 1         |
| <i>Aquaporin</i>                                        | Sotub03g036560.1.1 | AT3G16260.1 | 2         |
| <i>Aquaporin</i>                                        | Sotub01g014220.1.1 | AT3G56950.2 | 2         |
| <i>Aquaporin</i>                                        | Sotub06g009110.1.1 | AT4G00430.1 | 2         |
| <i>Aquaporin</i>                                        | Sotub01g032080.1.1 | AT4G23400.1 | 2         |
| <i>Aquaporin</i>                                        | Sotub01g049070.1.1 | AT4G35100.2 | 2         |
| <i>ARF3</i>                                             | Sotub02g020520.1.1 | AT2G33860.1 | 3         |
| <i>ARF4</i>                                             | Sotub01g036930.1.1 | AT1G54990.1 | 3         |
| <i>ATHB-15 [HD-ZipIII]</i>                              | Sotub03g036370.1.1 | AT1G79840.2 | 3         |
| <i>ATHB9</i>                                            | Sotub01g030790.1.1 | AT4G00730.1 | 3         |
| <i>CDK</i>                                              | Sotub01g029100.1.1 | AT2G44740.1 | 2         |
| <i>CDK</i>                                              | Sotub01g029950.1.1 | AT3G60550.1 | 2         |
| <i>CDK inhibitor</i>                                    | Sotub12g030040.1.1 | AT2G32710.2 | 2         |
| <i>CDK inhibitor</i>                                    | Sotub09g017820.1.1 | AT5G48820.1 | 2         |
| <i>Cyclin</i>                                           | Sotub01g025990.1.1 | AT5G21080.1 | 2         |
| <i>Cyclin A</i>                                         | Sotub03g029000.1.1 | AT2G18540.1 | 2         |
| <i>Cyclin B</i>                                         | Sotub02g026170.1.1 | AT1G20610.1 | 2         |
| <i>Cyclin D3</i>                                        | Sotub02g031650.1.1 | AT4G34090.1 | 4         |
| <i>Cyclin D3:1</i>                                      | Sotub02g031450.1.1 | AT5G67260.1 | 4         |
| <i>Cyclin D3:2</i>                                      | Sotub01g044850.1.1 | AT5G67260.1 | 4         |
| <i>DNA methyltransferase-associated protein (DMAP1)</i> | Sotub01g023480.1.1 | AT2G47210.1 | 5         |
| <i>DRM-type DNA-methyltransferase</i>                   | Sotub02g010360.1.1 | AT5G14620.1 | 5         |
| <i>Expansin</i>                                         | Sotub02g034760.1.1 | AT1G26770.2 | 2         |
| <i>Expansin</i>                                         | Sotub02g024320.1.1 | AT3G03220.1 | 2         |
| <i>Expansin</i>                                         | Sotub01g049420.1.1 | AT3G45970.1 | 2         |
| <i>GSK3</i>                                             | Sotub01g040370.1.1 | AT1G09840.6 | 6         |
| <i>GSK3</i>                                             | Sotub01g030780.1.1 | AT4G00720.1 | 6         |
| <i>GSK3</i>                                             | Sotub02g018890.1.1 | AT4G18710.1 | 6         |
| <i>GSK3</i>                                             | Sotub02g036240.1.1 | AT5G14640.1 | 6         |
| <i>H2B</i>                                              | Sotub03g016600.1.1 | AT2G28720.1 | 2         |
| <i>H2B</i>                                              | Sotub02g018820.1.1 | AT4G18740.1 | 2         |
| <i>H4</i>                                               | Sotub11g029670.1.1 | AT5G59970.1 | 2         |
| <i>PXY</i>                                              | Sotub02g030330.1.1 | AT5G65700.2 | 1         |
| <i>REVERSION-TO-ETHYLENE SENSITIVITY1 (RTE1)</i>        | Sotub02g010060.1.1 | AT3G51040.3 | 1         |
| <i>RUL1</i>                                             | Sotub03g018340.1.1 | AT5G58300.2 | 1         |

|                                             |                    |             |    |
|---------------------------------------------|--------------------|-------------|----|
| <i>SCRAMBLED (SCM)</i>                      | Sotub02g021640.1.1 | AT2G20850.1 | 1  |
| <i>VASCULAR TISSUE SIZE (VAS)</i>           | Sotub01g040060.1.1 | AT5G13900.1 | 7  |
| <i>VASCULAR TISSUE SIZE (VAS)</i>           | Sotub01g042060.1.1 | AT5G64080.1 | 7  |
| <i>XET/XTH</i>                              | Sotub03g008310.1.1 | AT1G11545.1 | 2  |
| <i>XET/XTH</i>                              | Sotub01g028070.1.1 | AT1G32170.1 | 2  |
| <i>XET/XTH</i>                              | Sotub12g019260.1.1 | AT4G25810.1 | 2  |
| <i>XET/XTH</i>                              | Sotub12g019250.1.1 | AT4G25810.1 | 2  |
| <i>XET/XTH</i>                              | Sotub01g037390.1.1 | AT5G13870.1 | 2  |
| <b>Shoot apical meristem</b>                |                    |             |    |
| <i>HD2 (HD2B)</i>                           | Sotub11g024650.1.1 | AT3G44750.2 | 8  |
| <i>MRG 1</i>                                | Sotub02g031380.1.1 | AT4G37280.1 | 9  |
| <i>No Apical Meristem (NAM)</i>             | Sotub03g017140.1.1 | AT3G49530.1 | 10 |
| <i>No Apical Meristem (NAM)</i>             | Sotub03g029340.1.1 | AT5G61430.1 | 10 |
| <i>No Apical Meristem (NAM)</i>             | Sotub04g009390.1.1 | AT1G01720.1 | 10 |
| <i>PHAVOLUTA-like HD-AIPIII protein</i>     | Sotub02g016070.1.1 | AT2G34710.1 | 11 |
| <i>RING1B</i>                               | Sotub02g020780.1.1 | AT5G44280.1 | 12 |
| <i>RINGLET2 (RTL2)</i>                      | Sotub02g020390.1.1 | AT1G28420.1 | 13 |
| <i>TOPLESS (TPL)</i>                        | Sotub03g030200.1.1 | AT3G15880.1 | 14 |
| <i>Topless-Related 2 (TPR2)</i>             | Sotub01g037850.1.1 | AT5G27030.1 | 15 |
| <b>Floral meristem</b>                      |                    |             |    |
| <i>CONSTANS</i>                             | Sotub01g025960.1.1 | AT3G63500.2 | 16 |
| <i>CONSTANS</i>                             | Sotub01g047820.1.1 | AT4G38960.1 | 16 |
| <i>CONSTANS</i>                             | Sotub02g022400.1.1 | AT5G54470.1 | 16 |
| <i>CYCLING DOF FACTOR 2 (CDF2)</i>          | Sotub02g034790.1.1 | AT5G39660.2 | 17 |
| <i>Jumonji</i>                              | Sotub04g018130.1.1 | AT5G04240.1 | 18 |
| <i>RED AND FAR-RED INSENSITIVE 2 (RF12)</i> | Sotub01g037570.1.1 | AT3G05545.1 | 19 |
| <i>SCM</i>                                  | Sotub02g021640.1.1 | AT2G20850.1 | 1  |
| <i>SFH12</i>                                | Sotub01g047280.1.1 | AT2G21540.2 | 20 |
| <i>StJMJ16</i>                              | Sotub04g009950.1.1 | AT1G08620.2 | 21 |
| <i>TFL2</i>                                 | Sotub01g027600.1.1 | AT5G17690.1 | 22 |
| <b>Root meristem</b>                        |                    |             |    |
| <i>ACAR FAMILY PROTEIN 4 (AtSCAR4)</i>      | Sotub02g019430.1.1 | AT2G34150.2 | 23 |
| <i>CYTOCHROME C-2 (CYTC-2)</i>              | Sotub01g040200.1.1 | AT4G10040.1 | 24 |
| <i>HAWAIIAN SKIRT (HS/HWS)</i>              | Sotub01g032770.1.1 | AT3G61590.2 | 25 |
| <i>MPK6</i>                                 | Sotub05g022310.1.1 | AT4G01370.1 | 26 |
| <i>RanGap 1</i>                             | Sotub01g023990.1.1 | AT5G19320.1 | 26 |
| <i>TONNEAU 1</i>                            | Sotub04g009490.1.1 | AT3G55000.1 | 26 |
| <i>TONNEAU 2/FASS</i>                       | Sotub01g021510.1.1 | AT5G18580.1 | 26 |

## References

- 1 Agusti, J., Lichtenberger, R., Schwarz, M., Nehlin, L. & Greb, T. Characterization of transcriptome remodeling during cambium formation identifies *MOL1* and *RUL1* as opposing regulators of secondary growth. *PLOS Genet.* **7**, e1001312, doi:10.1371/journal.pgen.1001312 (2011).
- 2 Schrader, J. *et al.* A high-resolution transcript profile across the wood-forming meristem of poplar identifies potential regulators of cambial stem cell identity. *Plant Cell* **16**, 2278-2292 (2004).
- 3 Ramachandran, P., Carlsbecker, A. & Etchells, J. P. Class III HD-ZIPs govern vascular cell fate: an HD view on patterning and differentiation. *J Exp Bot* **68**, 55-69 (2017).
- 4 Collins, C., Maruthi, N. M. & Jahn, C. E. *CYCD3* D-type cyclins regulate cambial cell proliferation and secondary growth in Arabidopsis. *J. Exp. Bot.* **66**, 4595-4606 (2015).
- 5 Ramos, M., Rocheta, M., Carvalho, L., Graça, J. & Morais-Cecilio, L. Expression analysis of DNA METHYLTRANSFERASE and co-repressor genes in *Quercus suber* phellogen: an attempt to correlate with cork quality. *BMC Proc* **5**, P169, doi:10.1186/1753-6561-5-S7-P169 (2011).
- 6 Kondo, Y. *et al.* Plant GSK3 proteins regulate xylem cell differentiation downstream of TDIF–TDR signalling. *Nature Commun.* **5**, 3504 (2014).
- 7 Van Der Graaff, E., Hooykaas Paul, J. J. & Keller, B. Activation tagging of the two closely linked genes *LEP* and *VAS* independently affects vascular cell number. *Plant J.* **32**, 819-830 (2002).
- 8 Han, Z. *et al.* *AtHD2D* gene plays a role in plant growth, development, and response to abiotic stresses in *Arabidopsis thaliana*. *Front. Plant Sci.* **7**, doi:10.3389/fpls.2016.00310 (2016).
- 9 Bu, Z. *et al.* Regulation of Arabidopsis flowering by the histone mark readers *MRG1/2* via Interaction with *CONSTANS* to modulate *FT* expression. *PLOS Genet.* **10**, e1004617, doi:10.1371/journal.pgen.1004617 (2014).
- 10 Souer, E., van Houwelingen, A., Kloos, D., Mol, J. & Koes, R. The *NO APICAL MERISTEM* gene of petunia is required for pattern formation in embryos and flowers and is expressed at meristem and primordia boundaries. *Cell* **85**, 159-170 (1996).
- 11 Yamada, T., Sasaki, Y., Hashimoto, K., Nakajima, K. & Gasser, C. S. *CORONA*, *PHABULOSA* and *PHAVOLUTA* collaborate with *BELL1* to confine *WUSCHEL* expression to the nucellus in Arabidopsis ovules. *Development* **143**, 422-426 (2016).
- 12 Xu, L. & Shen, W.-H. Polycomb silencing of *KNOX* genes confines shoot stem cell niches in Arabidopsis. *Curr. Biol.* **18**, 1966-1971 (2008).
- 13 Li, G. *et al.* Imitation switch chromatin remodeling factors and their interacting RINGLET proteins act together in controlling the plant vegetative phase in Arabidopsis. *Plant J.* **72**, 261-270 (2012).
- 14 Espinosa-Ruiz, A. *et al.* *TOPELESS* mediates brassinosteroid control of shoot boundaries and root meristem development in Arabidopsis thaliana. *Development* **144**, 1619-1628 (2017).
- 15 Zermiani, M. *et al.* Identification of the Arabidopsis RAM/MOR signalling network: adding new regulatory players in plant stem cell maintenance and cell polarization. *Ann. Bot.* **116**, 69-89 (2015).
- 16 Blázquez, M. A. Illuminating flowers: *CONSTANS* induces *LEAFY* expression. *Bioessays* **19**, 277-279 (1997).
- 17 Fornara, F. *et al.* Arabidopsis *DOF* transcription factors act redundantly to reduce *CONSTANS* expression and are essential for a photoperiodic flowering response. *Dev. Cell* **17**, 75-86 (2009).
- 18 Heidari, B., Nemie-Feyissa, D., Kangasjärvi, S. & Lillo, C. Antagonistic regulation of flowering time through distinct regulatory subunits of protein phosphatase 2A. *PLOS ONE* **8**, e67987, doi:10.1371/journal.pone.0067987 (2013).
- 19 Chen, M. & Ni, M. RFI2, a RING-domain zinc finger protein, negatively regulates *CONSTANS* expression and photoperiodic flowering. *Plant J.* **46**, 823-833 (2006).
- 20 Mo, P. *et al.* Identification of two phosphatidylinositol/phosphatidylcholine transfer protein genes that are predominately transcribed in the flowers of *Arabidopsis thaliana*. *J. Plant Physiol.* **164**, 478-486 (2007).

- 21 Shi, Y. Histone lysine demethylases: emerging roles in development, physiology and disease. *Nat Rev Genet* **8**, 829-833 (2007).
- 22 Larsson, A. S., Landberg, K. & Meeks-Wagner, D. R. The *TERMINAL FLOWER2 (TFL2)* gene controls the reproductive transition and meristem identity in *Arabidopsis thaliana*. *Genetics* **149**, 597-605 (1998).
- 23 Parizot, B., Roberts, I., Raes, J., Beeckman, T. & Smet, I. D. In silico analyses of pericycle cell populations reinforce their relation with associated vasculature in *Arabidopsis*. *Philos. Trans. R. Soc. B. Biol. Sci.* **367**, 1479-1488 (2012).
- 24 Welchen, E. & Gonzalez, D. H. Differential expression of the *ARABIDOPSIS CYTOCHROME C* genes *CYTC-1* and *CYTC-2*. Evidence for the involvement of TCP-domain protein-binding elements in anther- and meristem-specific expression of the *CYTC-1* gene. *Plant Physiol.* **139**, 88-100 (2005).
- 25 Kim, E. S. *et al.* *HAWAIIAN SKIRT* regulates the quiescent center-independent meristem activity in *Arabidopsis* roots. *Physiol. Plant.* **157**, 221-233 (2016).
- 26 Sotta, N., Shantikumar, L., Sakamoto, T., Matsunaga, S. & Fujiwara, T. *TPR5* is involved in directional cell division and is essential for the maintenance of meristem cell organization in *Arabidopsis thaliana*. *J. Exp. Bot.* **67**, 2401-2411 (2016).

**Table S3** Functional protein association networks within the phellogen transcriptome. Analysis was performed using STRING program (<https://string-db.org/>) based on Arabidopsis orthologs of phellogen-selected genes. Table lists interactomes based on Fig S5

| Phellogen query              | Query annotation                                         | Members of interactome                     | TAIR ID     | Interacted protein function                      |
|------------------------------|----------------------------------------------------------|--------------------------------------------|-------------|--------------------------------------------------|
| H2B<br>(AT2G28720.1)         | Histone H2B; core component of nucleosome                | H2AXA (histone H2AXa)                      | AT1G08880.1 | Chromatin remodeling                             |
|                              |                                                          | HTA6 (Histone H2A 6)                       | AT5G59870.1 | Chromatin remodeling                             |
| H3 (AT5G65360.1)             | Histone H3; core component of nucleosome                 | Histone H4                                 | AT5G59970.1 | Chromatin remodeling                             |
|                              |                                                          | HTA6                                       | AT5G59870.1 | Chromatin remodeling                             |
| H4 (AT5G59970.1)             | Histone H4; core component of nucleosome                 | Histone H3                                 | AT5G65360.1 | Chromatin remodeling                             |
|                              |                                                          | HMG (High mobility group)                  | AT3G28730.1 | Chromatin remodeling                             |
| GPAT3/GPAT4<br>(AT1G01610.1) | Glycerol-3-phosphate acyltransferase; cutin biosynthesis | GPDHp (Glycerol-3-phosphate dehydrogenase) | AT5G40610.1 | Glycerolipid metabolism                          |
|                              |                                                          | LPAT2 (Lysophosphatidyl acyltransferase 2) | AT3G57650.1 | Glycerolipid metabolism                          |
| ACT7<br>(AT5G09810.1)        | Actin 7; cytoskeleton array                              | transducin/WD40 domain-containing protein  | AT3G18060.1 | Actin filaments elongation during cell divisions |
|                              |                                                          | CPA (Capping protein A)                    | AT3G05520.2 | Actin filaments elongation during cell divisions |
| BTH4/MED15<br>(AT1G15780.1)  | Uncharacterized protein                                  | NA                                         | NA          | NA                                               |
| POD<br>(AT5G66390.1)         | Peroxidase 72; lignin/suberin biosynthesis               | CAD5 (Cinnamyl alcohol dehydrogenase 5)    | AT4G34230.1 | Lignin biosynthesis                              |
|                              |                                                          | OMT1 ( <i>O</i> -Methyltransferase 1)      | AT5G54160.1 | Lignin biosynthesis                              |
| APK1/ATH8<br>(AT2G39190)     | Transport and beta-oxidation of fatty acids              | ABCA1 (ATP-binding cassette A1)            | AT2G41700.1 | Transport and beta-oxidation of fatty acids      |

**Table S4** Primers used in this study

| Gene Name         | Sol genomics ID | NCBI ID      | TAIR ID   | Forward primer                    | Reverse primer         | Amplicon size (bp) |
|-------------------|-----------------|--------------|-----------|-----------------------------------|------------------------|--------------------|
| <b>CDS</b>        |                 |              |           |                                   |                        |                    |
| <i>ACT7</i>       | Sotub03g020330  | XM_006355076 | AT5G09810 | <u>CACCGATTA</u> AAAAATGGCCGACGG  | CAAACAACCTAAAAGAGACAC  | 1420               |
| <i>BTH4</i>       | Sotub04g009440  | XM_006359266 | AT1G15780 | <u>CACCGAGATGAATGGGAATAATTG</u>   | CACTAGGAACTTGACAATC    | 832                |
| <i>CCoAOMT1</i>   | Sotub02g031720  | XM_006339817 | AT4G34050 | <u>CACCGCAGTTATCAATGACAAGC</u>    | CTTGAACCTAATAGGTACATG  | 951                |
| <i>CFT</i>        | Sotub01g036860  | XM_006367783 | AT1G28590 | <u>CACCAATGGCGTTGACAGTTAGC</u>    | CGATGATTTATGTTGTTATTTG | 1303               |
| <i>GPAT3</i>      | Sotub01g032090  | XM_006339523 | AT1G01610 | <u>CACCAAAATGTCACCTTCCAAAATCC</u> | GACCTTAACAAGCCCGAGGG   | 1823               |
| <i>H2B</i>        | Sotub03g016600  | XM_006364383 | AT2G28720 | <u>CACCGCAAACAATGGCACCAAAGG</u>   | CATTCAAGGAATAGCTATG    | 583                |
| <i>H3</i>         | Sotub10g009520  | XM_006360980 | AT5G65360 | <u>CACCCCAAATGGCTCGTACCAAG</u>    | GAATCGAGTAAATTCTGAATC  | 517                |
| <i>H4</i>         | Sotub11g029670  | XM_006363280 | AT5G59970 | <u>CACCCAAAATGTCTGGCCGTGG</u>     | CAGAAACATAACCAATTACATC | 390                |
| <i>MTN</i>        | Sotub06g010040  | XM_006361145 | AT5G02380 | <u>CACCTTATAATGTCTGGTTGTGGTTC</u> | GTCCATATAGTTGAAGCAC    | 284                |
| <i>OSP</i>        | Sotub07g011080  | XM_006344513 | AT2G48030 | <u>CACCGCATATGAATTGTACCTCTC</u>   | CAGGGAGGGAGTTAACAAG    | 560                |
| <i>PED3</i>       | Sotub04g020700  | XM_006355290 | AT4G39850 | <u>CACCGTTAGTTCATCGCCATCCTCTG</u> | GTACACCATTTAATTTTTGG   | 1127               |
| <i>PhDZnP</i>     | Sotub01g044570  | XM_006346280 | AT3G19510 | <u>CACCTGAGATGTCAACTCTTGAAAC</u>  | CAATCTCAACCATTCCCG     | 2502               |
| <i>POD</i>        | Sotub02g027930  | XM_015304568 | AT5G66390 | <u>CACCTAAATCATGCCACAAGCACAAG</u> | CAGATGGAACAAGCGATG     | 1019               |
| <i>VAS</i>        | Sotub01g040060  | XM_006349221 | AT5G13900 | <u>CACCATTAATGGAGATGAAATAT</u>    | GATAGATCATAACAAGGGAG   | 508                |
| <b>qPCR</b>       |                 |              |           |                                   |                        |                    |
| <i>qACT7*</i>     |                 |              |           | GGAGAAGTTAGGTGGTGG                | CAAACAACCTAAAAGAGACAC  | 181                |
| <i>qBTH4*</i>     |                 |              |           | GAAGAAGATAGGAAGGTGG               | GGACATAAGAATCAACAAGCC  | 115                |
| <i>qCCoAOMT1*</i> |                 |              |           | CTTGAACCTAATAGGTACATG             | CTGCTTTAGAGGATTTATTATC | 168                |
| <i>qCFT*</i>      |                 |              |           | CGATGATTTATGTTGTTATTTG            | GATGTATACTGCTTTCTTCTC  | 147                |
| <i>qGPAT3*</i>    |                 |              |           | GGTGGGGTTCTTGGATTTG               | TAACAGAATCCCTCAAAGC    | 160                |
| <i>qH2B*</i>      |                 |              |           | CAGCTCTTAATCAGTTTTAG              | CATTCAAGGAATAGCTATG    | 156                |
| <i>qH3*</i>       |                 |              |           | GTTACTATCATGCCTAAGG               | GAATCGAGTAAATTCTGAATC  | 158                |
| <i>qH4*</i>       |                 |              |           | GGAAGACTGTTACTGCTATG              | CTACTAATACCCAATAACC    | 109                |
| <i>qMTN*</i>      |                 |              |           | CCATCATCGAAGGAGTTGC               | GTCCATATAGTTGAAGCAC    | 172                |
| <i>qOSP*</i>      |                 |              |           | CATCATTTACTAAAGATTTTG             | CAGGGAGGGAGTTAACAAG    | 173                |
| <i>qPED3*</i>     |                 |              |           | GTACACCATTTAATTTTTGG              | CATAATCTTTCCGGTCAGC    | 138                |

|                       |                |              |           |                        |                        |     |
|-----------------------|----------------|--------------|-----------|------------------------|------------------------|-----|
| <i>qPhDZnP</i>        |                |              |           | GACTCTCCCAAAGTAAGAC    | CAATCTCAACCATTCACCG    | 198 |
| <i>qPOD*</i>          |                |              |           | CAGATGGAACAAGCGATG     | GCCAAGTCTATGGTTAAGATGG | 217 |
| <i>qVAS*</i>          |                |              |           | GTCTTAAAGGTGCATCAAATTC | CAACAATTAATACACAAAGG   | 145 |
| <b>Reference gene</b> |                |              |           |                        |                        |     |
| <i>qNAC</i>           | Sotub10g027110 | XM_006339185 | AT3G12390 | ATATAGAGCTGGTGATGACT   | TCCATGATAGCAGAGACTA    | 97  |
| <i>qUbq</i>           | Sotub12g030900 | Y10024.1     | AT2G47110 | GTTTTACAAGGTTGATGATTC  | GAGCAAATCTAAGATAAAGC   | 202 |
| <i>qACT</i>           | Sotub10g022240 | XM_006351284 | AT3G12110 | GAGTTGATTGTTGGGTTATG   | GTGAAATGATTTAATGATGTG  | 179 |

Underlined CCAC was required for pENTER cloning

\*Primers designed based on phellogen transcriptome sequences
